# Supplementary material for: Gold nanoparticles endowed with low-temperature colloidal stability by cyclic polyethylene glycol in ethanol
Source: Royal Society of Chemistry journal article supplement (doi:10.1039/d1sm00720c), 2021-01-01
Supplement: d1sm00720c1.pdf [file d1sm00720c1.pdf]

## Gold Nanoparticles Endowed with Low-Temperature Colloidal Stability by Cyclic Polyethylene Glycol in Ethanol

M. Ali Aboudzadeh,<sup>a,b</sup> Joscha Kruse,<sup>a,b</sup> Maria Sanromán Iglesias,<sup>a,b</sup> Daniele Cangialosi,<sup>a,b</sup> Angel Alegria,<sup>b,c</sup> Marek Grzelczak,<sup>\*a,b</sup> Fabienne Barroso-Bujans<sup>\*a,b,d</sup>

<sup>a</sup>Donostia International Physics Center (DIPC), Paseo Manuel Lardizábal 4, 20018 Donostia–San Sebastián, Spain

<sup>b</sup>Materials Physics Center, CSIC-UPV/EHU, Paseo Manuel Lardizábal 5, 20018 Donostia–San Sebastián, Spain

<sup>c</sup>Departamento de Polímeros y Materiales Avanzados: Física, Química y Tecnología, University of the Basque Country (UPV/EHU), Apartado 1072, Donostia–San Sebastián 20080, Spain

<sup>d</sup>KERBASQUE - Basque Foundation for Science, María Díaz de Haro 3, E-48013 Bilbao, Spain

### Experimental

**Fast scanning calorimetry.** FSC experiments were performed in nitrogen atmosphere by using a Flash DSC 1 of Mettler Toledo based on chip calorimetry technology and equipped with a two-stage intracooler allowing for temperature control between -90 and 450 °C. Dry AuNP@PEG 11k samples with mass about 100 ng were heated at 1000 K s<sup>-1</sup> from -80 °C to 80 °C after quenching all samples from 80 °C at the same rate.

### Supporting Figures

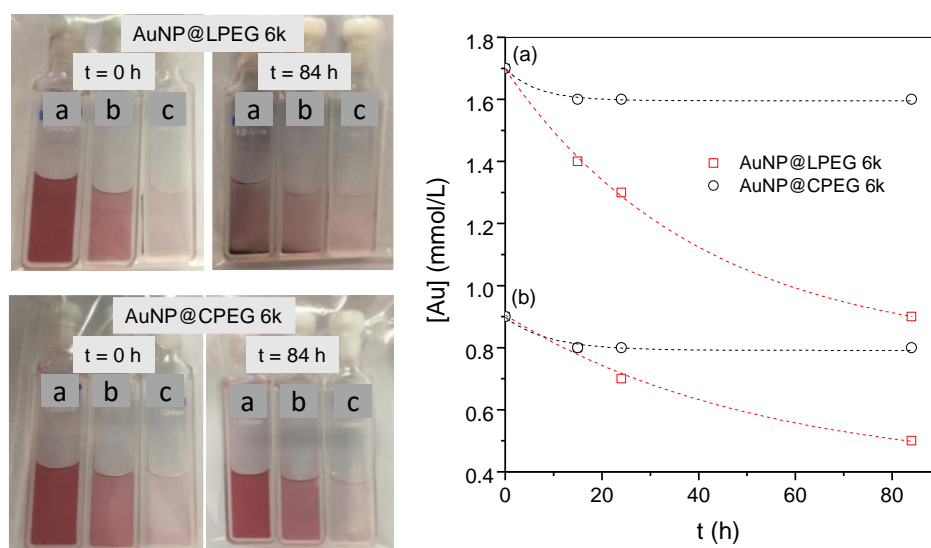

Figure S1. Left: Pictures of AuNP@LPEG 6k and AuNP@CPEG 6k dispersed in ethanol at different concentrations at the initial state and after cooling at -25 °C in a freezer for 84 h. (a) [Au<sup>0</sup>] = 1.7 mM, (b) [Au<sup>0</sup>] = 0.9 mM and (c) [Au<sup>0</sup>] = 0.2 mM. Changes in sample (c)

were not visually observed due to the low AuNP concentration. Right: Concentration of AuNP remaining in the supernatant as a function of time, determined by UV-Vis. Note that the whole concentration of AuNP in the sample remains constant.

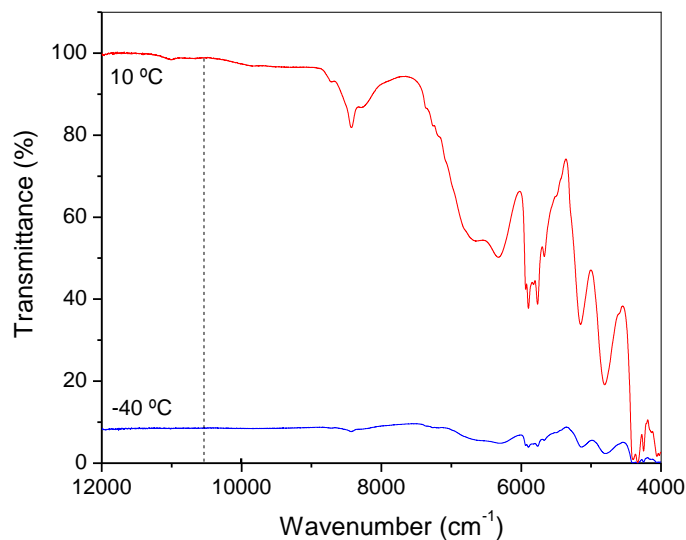

Figure S2. NIR transmittance of LPEG 6k in ethanol (5 wt% ) at 10 and -40 °C. Optical path = 1 mm. Dash line shows the wavenlength (10500 cm<sup>-1</sup>) at which the solution transmittance was measured as a function of temperature (see main text). The observed bands correspond to ethanol, the major component.

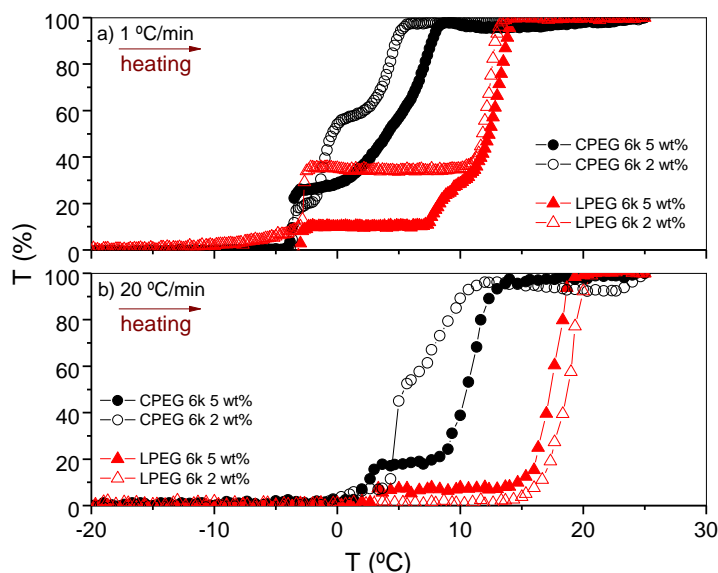

Figure S3. Solution transmittance,  $T(\%)_{\text{heating}}$ , of CPEG 6k and LPEG 6k in ethanol ( $c = 2$  and 5 wt%) at heating rates of a) 1 °C/min and b) 20 °C/min.

Under heating, the light transmittance increases but not monotonously (Figure S3). In all cases, the transition temperature for CPEG occurs at lower temperatures than for LPEG. The steps of T (%) detected during heating are related to the different stages

visually observed during the change from the solid-like paste to a transparent liquid solution. First, a liquid starts moving and then the turbidity disappears (Figure S4). In the microscope we could detect the advance of the liquid front before the disappearance of the spherulite-like structures. These results are in line with the existence of long-range network structures in PEG/ethanol mixtures.<sup>1</sup>

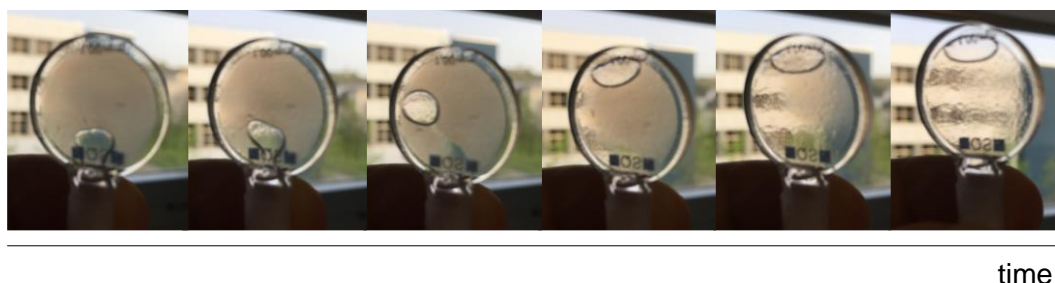

Figure S4. Pictures of CPEG 6k / ethanol (2 wt%) cooled at  $-60\text{ }^{\circ}\text{C}$  and then exposed to air to see how the solid-like paste evolve in about 1 min. First, the liquid starts to move (the bubble moves up) and then, the turbidity disappears. Droplets in the cuvette glass are due to water condensation.

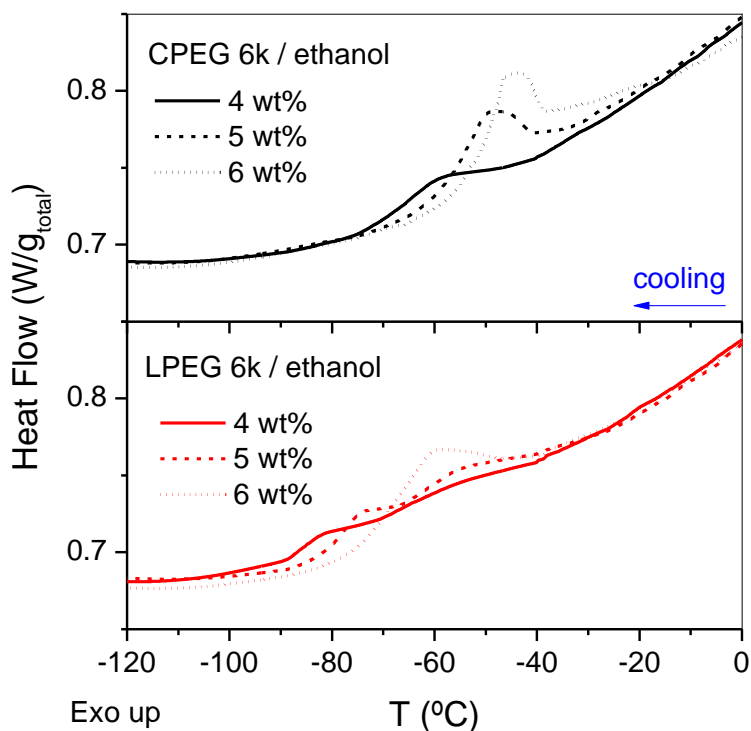

Figure S5. Cooling DSC scans ( $20\text{ }^{\circ}\text{C}/\text{min}$ ) of CPEG 6k and LPEG 6k solutions in ethanol at different polymer concentrations. Heat flow is referred to the total mass of sample (PEG + ethanol). At lower polymer concentrations, a peak was difficult to detect.

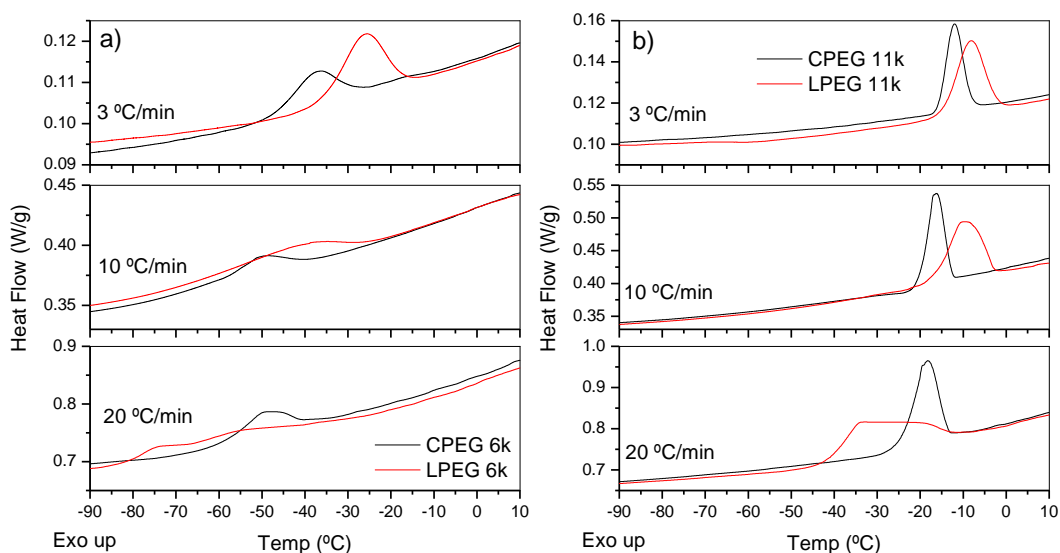

Figure S6. Cooling DSC scans of CPEG and LPEG in ethanol (5 wt%) at different cooling rates (3, 10 and 20 °C/min). a)  $M_n = 6$  kg/mol and b)  $M_n = 11$  kg/mol.

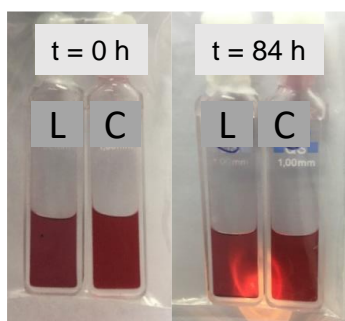

L = AuNP@LPEG 6k / EtOD  
C = AuNP@CPEG 6k / EtOD

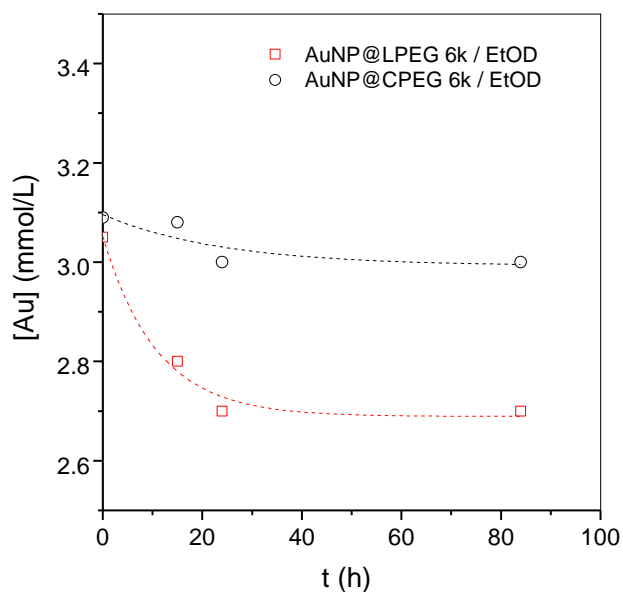

Figure S7. Left: Pictures of AuNP@LPEG 6k and AuNP@CPEG 6k dispersed in deuterated ethanol (EtOD) at the initial state and after cooling at  $-25$  °C in a freezer for 84 h. Right: Concentration of AuNP remaining in the supernatant as a function of time, determined by UV-Vis. Note that the whole concentration of AuNP in the sample remains constant.

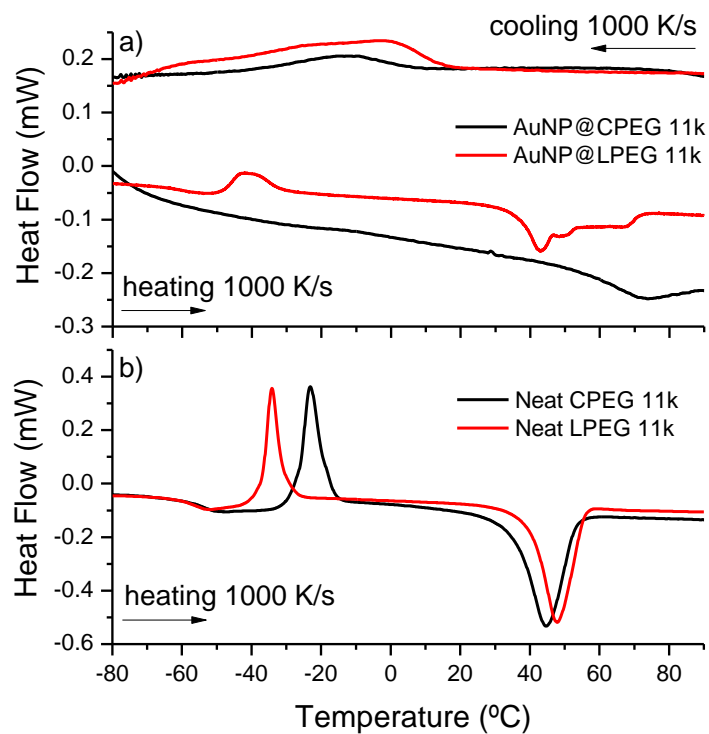

Figure S8. a) FSC data of dry AuNP@CPEG 11k and AuNP@LPEG 11k obtained by cooling and heating at 1000 K/s. b) Heating run of neat CPEG and LPEG 11k samples.

## References

1. D. L. Ho, B. Hammouda, S. R. Kline and W.-R. Chen, *J. Polym. Sci. B Polym. Phys.*, 2006, **44**, 557-564.
